# Supplementary material
Source: bioRxiv or medRxiv preprint supplement (https://www.biorxiv.org/highwire/filestream/62242/field_highwire_adjunct_files/6/130948-5.pdf)
Supplement: Supplementary file [file 130948-5.pdf]

# Supplementary Figure 5

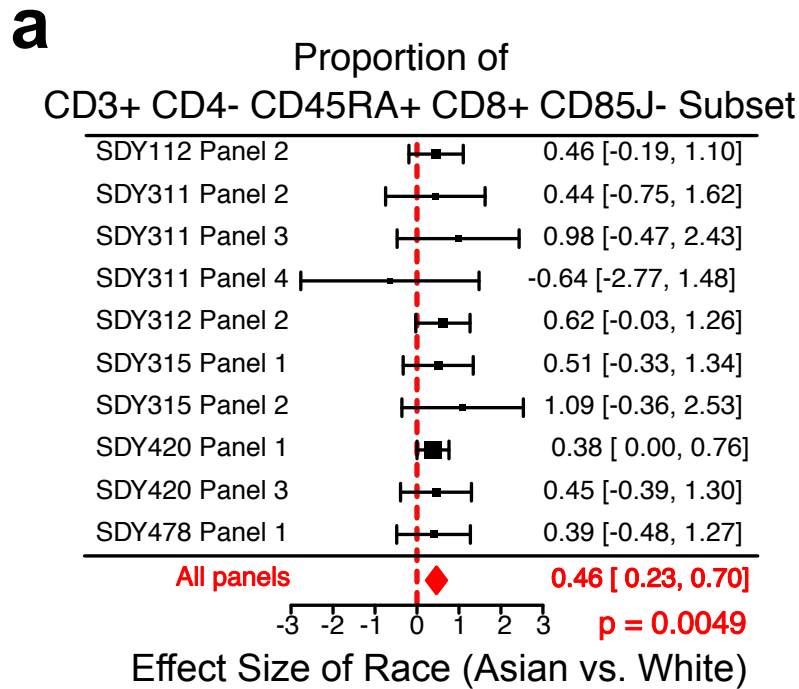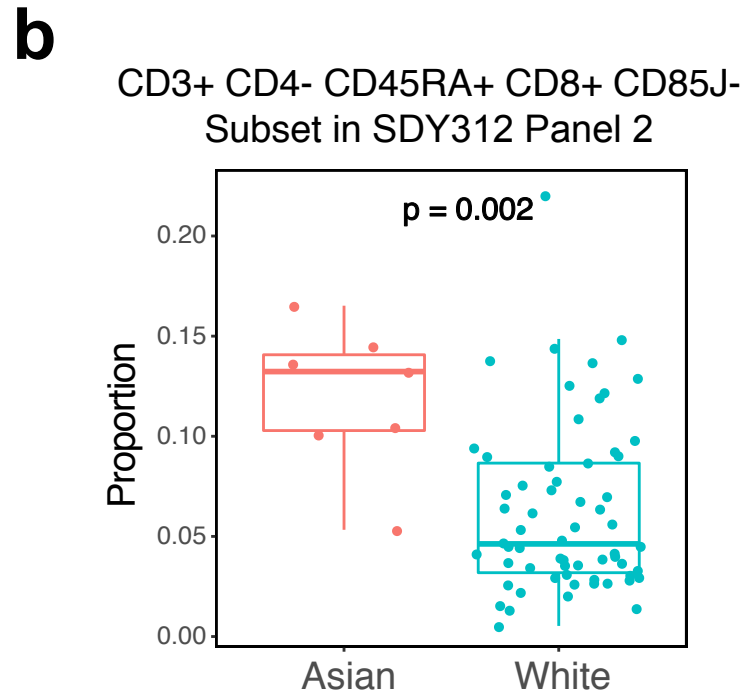

Supplementary Figure 5: An example of racial differences identified by the unsupervised pipeline. **(a)** Forest plot showing the effect size of race (Asian vs. White) on the proportion of a novel cell subset (CD3+CD4-CD45RA+CD8+CD85J-) identified by the unsupervised analysis pipeline. **(b)** The proportion of the CD3+CD4-CD45RA+CD8+CD85J- cell subset in PBMC from Asian and White subjects in panel 2 of SDY312. The p value in **a** is calculated using a random effect model, adjusted using Benjamini-Hochberg correction. p value in **b** is calculated from unpaired Mann-Whitney test without correction. See Supplementary Table 5 for a complete list of differences in immune cells between races identified by the unsupervised pipeline.
